# Supplementary material for: Curcumin alleviates LPS-induced intestinal homeostatic imbalance through reshaping gut microbiota structure and regulating group 3 innate lymphoid cells in chickens
Source: Royal Society of Chemistry journal article supplement (doi:10.1039/d2fo02598a), 2022-01-01
Supplement: d2fo02598a1.pdf [file d2fo02598a1.pdf]

**Table S1 Ingredient composition of the basal diet (% , as-fed basis)**

| Component                            | Content | Nutrient composition <sup>2</sup> | Level |
|--------------------------------------|---------|-----------------------------------|-------|
| Corn                                 | 52.07   | Metabolizable energy (MJ/kg)      | 12.38 |
| Wheat                                | 5.00    | CP                                | 21.60 |
| Soybean meal (45% crude protein)     | 33.0    | Ca                                | 1.00  |
| Corn gluten meal (52% crude protein) | 3.00    | Total P                           | 0.74  |
| Soybean oil                          | 2.28    | Available P                       | 0.47  |
| <i>L</i> -Lysine·HCl (98.5%)         | 0.25    | Total Lys                         | 1.29  |
| <i>DL</i> -Methionine (99%)          | 0.17    | Total Met                         | 0.52  |
| Limestone                            | 1.25    | Total Met+Cys                     | 0.93  |
| Dicalcium phosphate                  | 1.68    | Total Thr                         | 0.86  |
| Sodium chloride                      | 0.30    | Total Trp                         | 0.21  |
| Premix <sup>1</sup>                  | 1.00    | Total Ile                         | 0.77  |
| Total                                | 100.00  |                                   |       |

<sup>1</sup>The premix provided per kilogram of diet: vitamin A, 12,000 IU; vitamin D<sub>3</sub>, 600 IU; vitamin E, 45 mg; vitamin K<sub>3</sub>, 2.5 mg; vitamin B<sub>1</sub>, 2.4 mg; vitamin B<sub>2</sub>, 5.0 mg; vitamin B<sub>6</sub>, 3.5 mg; vitamin B<sub>12</sub>, 0.01 mg; choline, 1,300 mg; nicotinic acid, 42 mg; pantothenic acid, 12 mg; folic acid, 1.00 mg; biotin, 0.12 mg; Fe, 80 mg; Cu, 7.0 mg; Mn, 80 mg; Zn, 85 mg; I, 0.70 mg; Se, 0.15 mg.

<sup>2</sup>Total Lys, Met, Met+Cys, Thr, Ile, and ME were calculated values in the mixed feed. CP was measured value.

**Table S2 Primer sequences used for quantitative real-time PCR**

| Genes          | Direction | Primer sequence (5'-3') | NCBI References | Amplicon (bp) |
|----------------|-----------|-------------------------|-----------------|---------------|
| <i>OCN</i>     | Forward   | TCATCCTGCTCTGCCTCATCT   | NM_205128.1     | 147           |
|                | Reverse   | CATCCGCCACGTTCTTCAC     |                 |               |
| <i>ZO-1</i>    | Forward   | CCAAAGACAGCAGGAGGAGA    | XM_015278981.1  | 217           |
|                | Reverse   | TGGCTAGTTTCTCTCGTGCA    |                 |               |
| <i>CLDN1</i>   | Forward   | CTTCATCATTGCAGGTCTGTCAG | NM_001013611.2  | 103           |
|                | Reverse   | AAATCTGGTGTTAACGGGTG    |                 |               |
| <i>MUC2</i>    | Forward   | CATTCAACGAGGAGAGCTGC    | NM_001318434.1  | 248           |
|                | Reverse   | TTCCTTGCAGCAGGAACAAC    |                 |               |
| <i>FXR</i>     | Forward   | CAGAAAGAATGCAGCGGCTC    | NM_204113.2     | 94            |
|                | Reverse   | CAAACCTGCCCATTTTGCGA    |                 |               |
| <i>GPRC6A</i>  | Forward   | TGAAATGCTGCAACCAGAAG    | XM_040666655.2  | 217           |
|                | Reverse   | GGACAGGAACCTCAGAGCAG    |                 |               |
| <i>GPRC5A</i>  | Forward   | AGCCAGGTTACGGAGGATTT    | XM_040660498.2  | 208           |
|                | Reverse   | GATGCCAGCATAACCACACAC   |                 |               |
| <i>GPRC5B</i>  | Forward   | CGAACATAATGCAGCGCTAA    | XM_015294794.2  | 225           |
|                | Reverse   | GCCAGGGAATAATTCTGCAA    |                 |               |
| <i>GPRC5C</i>  | Forward   | CCATCCTGAAGGAGCAGAAG    | XM_040649806.1  | 163           |
|                | Reverse   | TTGTGCATCAGAGCCATCTC    |                 |               |
| <i>SIRT1</i>   | Forward   | TAACATGGAGGCTTGGCTGA    | NM_001004767.2  | 193           |
|                | Reverse   | GACATCACTCGAAGCAGCAG    |                 |               |
| <i>SIRT2</i>   | Forward   | CCACCGTTTGCCACTACTTC    | NM_001017414.2  | 202           |
|                | Reverse   | TTCTCCTTCACCCAGCTCAG    |                 |               |
| <i>SIRT3</i>   | Forward   | ATCTTGTAGGACCGTTTGCC    | NM_001199493.1  | 173           |
|                | Reverse   | GCCAGCTGTCCTATTTGTCT    |                 |               |
| <i>SIRT4</i>   | Forward   | GCATTTCAAACCAGAGCCCA    | XM_025155741.2  | 179           |
|                | Reverse   | CTTGGCTGAGACCCTCTTCA    |                 |               |
| <i>SIRT5</i>   | Forward   | TAAACATCCCAACGCTGCAC    | NM_001276364.2  | 191           |
|                | Reverse   | TTGCAGTCACGTTTCCACAG    |                 |               |
| <i>SIRT6</i>   | Forward   | GGACCGACAACAATGAGCTC    | NM_001039320.2  | 150           |
|                | Reverse   | AGCTCACACACCTTCCTCTC    |                 |               |
| <i>SIRT7</i>   | Forward   | TCAAAACTGTGATGGGCTGC    | NM_001291971.1  | 243           |
|                | Reverse   | TGTGTCAGTGTCCCCTTCTC    |                 |               |
| <i>IL17A</i>   | Forward   | GGAGAACTGCCTTGCCTAAC    | NM_204460.2     | 165           |
|                | Reverse   | CTCATGGAGCACGTTGGAAG    |                 |               |
| <i>IL22</i>    | Forward   | AACTTCCAGCAGCCCTACAT    | NM_001199614.1  | 192           |
|                | Reverse   | CTTGGCCTCTGTGAGAAGGA    |                 |               |
| $\beta$ -actin | Forward   | AAGCCAACAGAGAGAAGATGA   | NM_205518       | 101           |
|                | Reverse   | ACCAGAGGCATACAGGGA      |                 |               |

*OCN*, occludin; *CLDN1*, claudin 1; *ZO-1*, Zona Occludens 1; *MUC2*, mucin 2; *FXR*, farnesoid X receptor; *GPRC6A*, G protein-coupled receptor class C group 6 member A; *GPRC5A*, G protein-coupled receptor class C group 5 member A; *GPRC5B*, G protein-coupled receptor class C group 5 member B; *GPRC5C*, G protein-coupled receptor class C group 5 member C. *SIRT1*, sirtuin 1; *SIRT2*, sirtuin 2; *SIRT3*, sirtuin 3; *SIRT4*, sirtuin 4; *SIRT5*, sirtuin 5; *SIRT6*, sirtuin 6; *SIRT7*, sirtuin 7; *IL17A*, interleukin 17A; *IL22*, interleukin 22.

**Table S3 Characteristic fragment ions of CA, CDCA, DCA, LCA standards and their optimized MS/MS conditions**

| Metabolites | Q1    | Q3    | Declustering potential (ev) | Collision Energy (ev) |
|-------------|-------|-------|-----------------------------|-----------------------|
| CA          | 406.9 | 289.3 | -130                        | -59                   |
|             |       | 195.0 | -130                        | -52                   |
| CDCA        | 391.2 | 391.2 | -130                        | -34                   |
| DCA         | 391.2 | 343.4 | -130                        | -53                   |
|             |       | 327.2 | -130                        | -53                   |
| LCA         | 375.2 | 375.2 | -130                        | -7                    |

CA, cholic acid; CDCA, chenodexychoic acid; DCA, deoxychoic acid; LCA, lithocholic acid.

**Table S4 Effects of curcumin (CUR) supplementation on the percentages of ileal Lamina propria lymphocytes expressing cell-surface antigens for CD3<sup>+</sup>, CD4<sup>+</sup>, CD8<sup>+</sup>, and BU\_1<sup>+</sup>**

| Items                 | Saline             |                     | LPS                |                     | SEM   | P-value |        |         |
|-----------------------|--------------------|---------------------|--------------------|---------------------|-------|---------|--------|---------|
|                       | CON                | CUR                 | CON                | CUR                 |       | CUR     | LPS    | CUR×LPS |
| CD3 <sup>+</sup> (%)  | 19.60 <sup>b</sup> | 29.00 <sup>a</sup>  | 14.22 <sup>c</sup> | 18.91 <sup>b</sup>  | 0.712 | <0.001  | <0.001 | 0.004   |
| CD4 <sup>+</sup> (%)  | 4.32 <sup>b</sup>  | 4.61 <sup>b</sup>   | 3.37 <sup>c</sup>  | 5.39 <sup>a</sup>   | 0.208 | <0.001  | 0.679  | <0.001  |
| CD8 <sup>+</sup> (%)  | 15.27 <sup>b</sup> | 24.39 <sup>a</sup>  | 10.85 <sup>d</sup> | 13.52 <sup>c</sup>  | 0.566 | <0.001  | <0.001 | 0.036   |
| CD4: CD8 ratio        | 0.28               | 0.30                | 0.32               | 0.40                | 0.025 | 0.023   | 0.018  | 0.266   |
| BU_1 <sup>+</sup> (%) | 17.16 <sup>c</sup> | 25.84 <sup>ab</sup> | 31.83 <sup>a</sup> | 22.93 <sup>bc</sup> | 2.849 | 0.014   | 0.036  | 0.009   |

Values are mean and pooled SEM,  $n = 12$ . Means with no common superscript in the same row are significantly different ( $P < 0.05$ ).

CD3<sup>+</sup>, CD3<sup>+</sup> T-lymphocyte subset; CD4<sup>+</sup>, CD4<sup>+</sup> T-lymphocyte subset; CD8<sup>+</sup>, CD8<sup>+</sup> T-lymphocyte subset; BU\_1<sup>+</sup>, BU\_1<sup>+</sup> B cells.

Figure S1

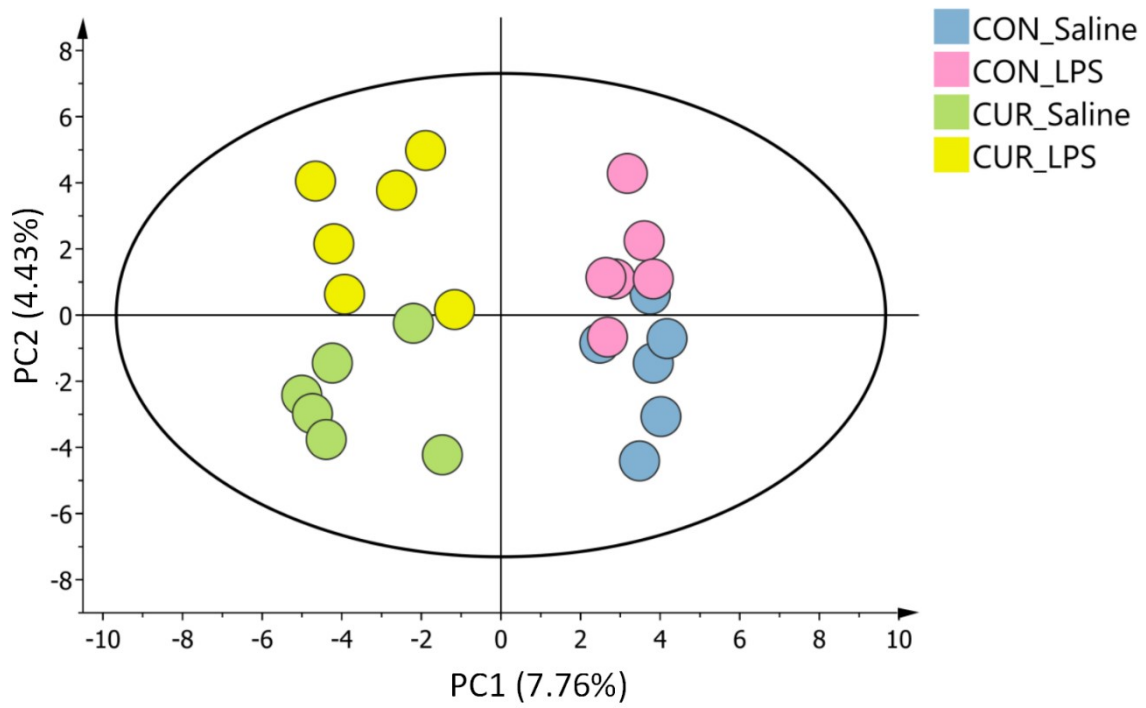

FIGURE S1. Score plots of principal component analysis derived from GC-MS data showing the metabolism differences of digesta samples among different treatment groups of chickens.

Figure S2

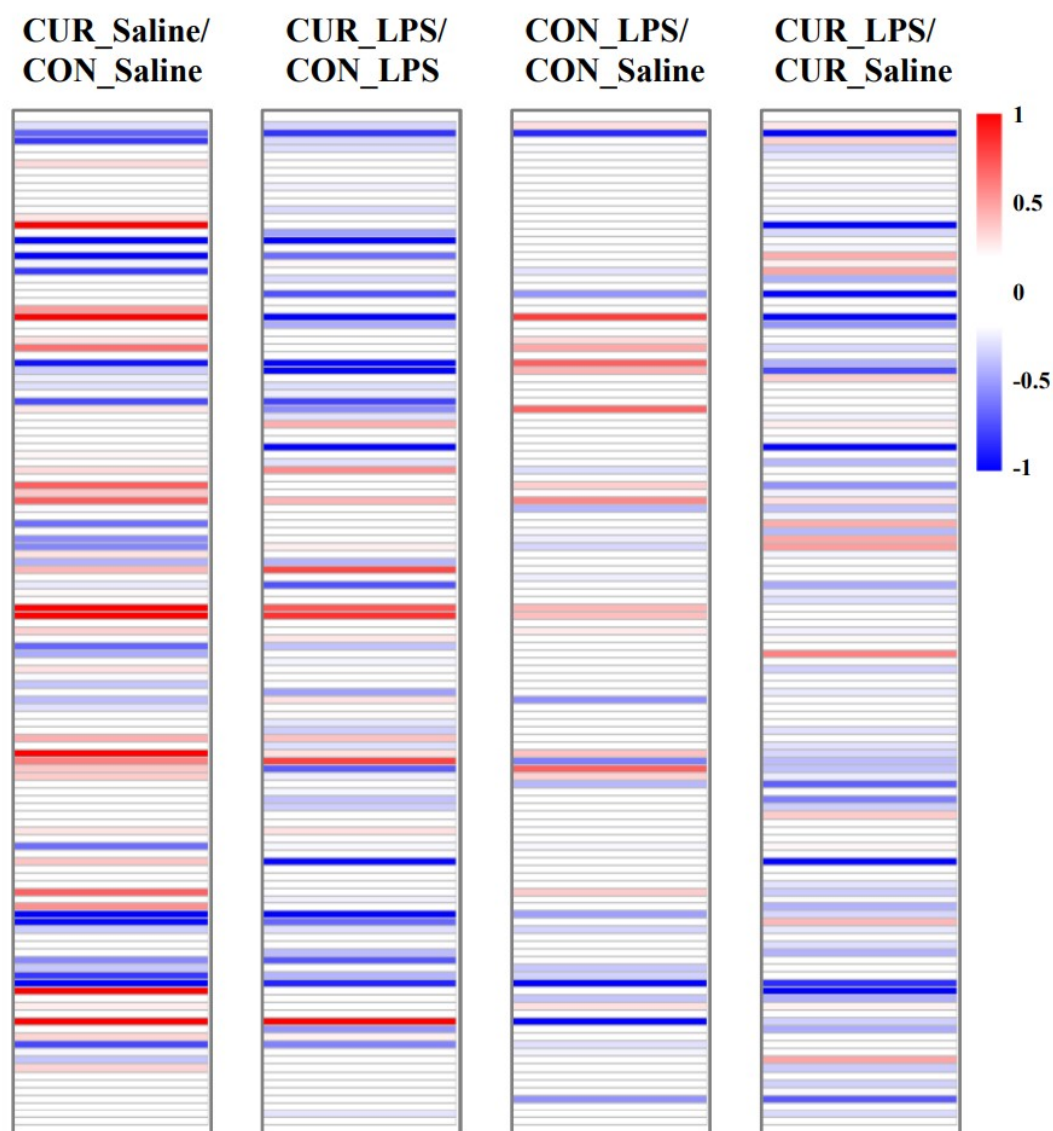

FIGURE S2. The heat map of Log<sub>2</sub> fold change (Log<sub>2</sub>FC) of all metabolites identified by GC-MS. The fold change of each metabolite between every pair-wise comparison was computed as the ratio of their mean abundance. Note that: CON\_Saline, chickens fed the control diet and injected with saline; CUR\_Saline, chickens fed the curcumin diet and injected with saline; CON\_LPS, chickens fed the control diet and challenged with LPS; CUR\_LPS, chickens fed the curcumin diet and challenged with LPS.
